# Supplementary material
Source: publisher site journal article supplement (https://www.spandidos-publications.com/4142/downloadSupplementary)
Supplement: Supplementary file 1 [file downloadSupplementary]

## Sheet: Feuil1
Tables SI. List and distribution of all variants observed.
Nucleotide variant	Protein variant	Significance	Total number of patients	Number of lung cancer	Number of colon cancer	Number of melanoma	Number of GIST
ALK
c.12C>G	p.Ile4Met	Unknown	1	1
c.83G>A	p.Arg28His	Unknown	2		1	1
c.106C>T	p.Pro36Ser	Benign	4	2	1	1
c.107C>T	p.Pro36Leu	Unknown	1		1
c.119C>T	p.Pro40Leu	Unknown	1	1
c.121C>T	p.Arg41Trp	Unknown	1	1
c.124delG	p.Glu42SerfsTer39	Loss of function	1	1
c.131T>G	p.Leu44Arg	Unknown	1		1
c.143G>A	p.Arg48His	Unknown	1	1
c.146T>C	p.Leu49Pro	Unknown	1		1
c.307G>T	p.Gly103Trp	Unknown	1	1
c.329G>T	p.Trp110Leu	Unknown	1	1
c.350C>A	p.Pro117Gln	Unknown	1	1
c.361C>T	p.Arg121Trp	Unknown	2		2
c.362G>A	p.Arg121Gln	Unknown	1			1
c.368T>C	p.Leu123Pro	Unknown	1	1
c.392C>T	p.Ser131Phe	Unknown	1	1
c.419A>C	p.Gln140Pro	Unknown	1			1
c.474delC	p.Glu160ArgfsTer26	Loss of function	1		1
c.485_490delCTGTGG	p.Ala162_Val163del	Unknown	1		1
c.490G>A	p.Gly164Arg	Unknown	1	1
c.506A>G	p.Asn169Ser	Unknown	2	1	1
c.542G>A	p.Gly181Asp	Unknown	1	1
c.550C>T	p.Arg184Ter	Loss of function	1		1
c.561C>G	p.Ile187Met	Unknown	1	1
c.583G>C	p.Ala195Pro	Unknown	1	1
c.595G>T	p.Gly199Cys	Unknown	1	1
c.598A>T	p.Arg200Ter	Loss of function	1	1
c.604G>T	p.Gly202Ter	Loss of function	1	1
c.605G>A	p.Gly202Glu	Unknown	1	1
c.607A>T	p.Arg203Trp	Unknown	1	1
c.608G>C	p.Arg203Thr	Unknown	1	1
c.623T>C	p.Ile208Thr	Unknown	1	1
c.641G>A	p.Arg214His	Unknown	1	1
c.661G>A	p.Gly221Arg	Unknown	1	1
c.677C>A	p.Ser226Tyr	Unknown	1	1
c.701C>A	p.Pro234His	Unknown	1	1
c.707C>A	p.Pro236His	Unknown	1	1
c.715G>A	p.Asp239Asn	Unknown	1			1
c.733C>A	p.Leu245Ile	Unknown	2	1	1
c.747G>A	p.Met249Ile	Unknown	1		1
c.766C>A	p.Leu256Met	Unknown	1	1
c.782G>A	p.Arg261Gln	Unknown	4		3	1
c.808T>C	p.Phe270Leu	Unknown	3	1	2
c.839T>A	p.Leu280Gln	Unknown	1	1
c.880C>T	p.Pro294Ser	Unknown	1	1
c.886G>A	p.Glu296Lys	Benign	1	1
c.907T>C	p.Leu303Leu	Unknown	1		1
c.916G>A	p.Gly306Arg	Unknown	1	1
c.931C>A	p.Arg311Ser	Unknown	1	1
c.932G>A	p.Arg311His	Benign	1	1
c.938A>C	p.Lys313Thr	Unknown	1	1
c.956C>T	p.Ser319Phe	Unknown	1	1
c.1183C>T	p.Arg395Cys	Benign	1	1
c.1168C>T	p.Gln390Ter	Loss of function	1	1
c.1171G>T	p.Gly391Ter	Loss of function	1	1
c.1184G>A	p.Arg395His	Unknown	1		1
c.1264C>A	p.Leu422Met	Unknown	1	1
c.1268A>T	p.Lys423Met	Unknown	1	1
c.1281A>T	p.Glu427Asp	Unknown	1		1
c.1286C>T	p.Thr429Ile	Unknown	1		1
c.1345C>T	p.Leu449Phe	Unknown	1			1
c.1348C>T	p.Gln450Ter	Loss of function	1	1
c.1390G>A	p.Gly464Arg	Unknown	1			1
c.1411T>A	p.Cys471Ser	Unknown	1	1
c.1415-2A>T	Splicing site	Unknown	1		1
c.1423C>T	p.Pro475Ser	Unknown	2		2
c.1426G>T	p.Val476Leu	Unknown	1	1
c.1441A>G	p.Asn481Asp	Unknown	2		2
c.1537G>A	p.Asp513Asn	Unknown	1			1
c.1564_1574delAGTACCACTGA	p.Ser522CysfsTer5	Loss of function	1		1
c.1580C>A	p.Pro527His	Unknown	1	1
c.1613C>T	p.Thr538Met	Unknown	2		2
c.1648-1G>A	Splicing site	Loss of function	1		1
c.1670G>A	p.Arg557His	Unknown	1	1
c.1720G>A	p.Gly574Arg	Unknown	1	1
c.1733G>T	p.Gly578Val	Unknown	1	1
c.1753G>A	p.Ala585Thr	Unknown	2		2
c.1753G>T	p.Ala585Ser	Unknown	1	1
c.1765G>A	p.Gly589Ser	Unknown	1	1
c.1766G>C	p.Gly589Ala	Unknown	1	1
c.1784G>A	p.Trp595Ter	Loss of function	2	2
c.1788G>A	p.Met596Ile	Unknown	1			1
c.1801C>A	p.Leu601Ile	Unknown	1		1
c.1815C>A	p.Asp605Glu	Unknown	1	1
c.1865dupT	p.Val623ArgfsTer4	Loss of function	1	1
c.1892G>A	p.Ser631Asn	Unknown	1		1
c.1897G>A	p.Asp633Asn	Unknown	1			1
c.1918G>A	p.Gly640Arg	Unknown	2	2
c.1943C>T	p.Thr648Ile	Benign	1		1
c.1958G>T	p.Arg653Ile	Unknown	1	1
c.1962C>A	p.Asn654Lys	Unknown	1			1
c.1990C>A	p.Leu664Met	Unknown	1	1
c.1999G>A	p.Gly667Arg	Unknown	1	1
c.2019G>T	p.Gln673His	Unknown	1		1
c.2021C>A	p.Thr674Asn	Unknown	1		1
c.2027T>C	p.Ile676Thr	Unknown	1		1
c.2039C>T	p.Thr680Ile	Benign	6	3	3
c.2075G>A	p.Gly692Glu	Unknown	1			1
c.2080delC	p.His694MetfsTer17	Loss of function	1		1
c.2117A>G	p.Gln706Arg	Unknown	1	1
c.2133C>A	p.Ser711Arg	Unknown	1	1
c.2152G>A	p.Gly718Ser	Unknown	1			1
c.2194G>A	p.Asp732Asn	Unknown	1		1
c.2207T>C	p.Ile736Thr	Unknown	1	1
c.2212G>A	p.Gly738Ser	Unknown	1	1
c.2258G>A	p.Arg753Gln	Unknown	1		1
c.2392A>G	p.Asn798Asp	Unknown	1		1
c.2465delG	p.Gly822ValfsTer9	Loss of function	1		1
c.2519T>C	p.Ile840Thr	Unknown	2	2
c.2536G>A	p.Gly846Ser	Unknown	1	1
c.2560G>A	p.Asp854Asn	Unknown	1	1
c.2573C>A	p.Pro858Gln	Unknown	1	1
c.2597C>T	p.Ser866Leu	Unknown	1			1
c.2633-2A>G	Splicing site	Unknown	1		1
c.2649G>A	p.Trp883Ter	Loss of function	1	1
c.2690A>T	p.Gln897Leu	Unknown	1	1
c.2701A>G	p.Thr901Ala	Unknown	1	1
c.2704G>A	p.Gly902Arg	Unknown	1		1
c.2724G>T	p.Gln908His	Unknown	1		1
c.2781delG	p.Cys928AlafsTer11	Loss of function	2		2
c.2845G>A	p.Glu949Lys	Unknown	2		2
c.2864G>T	p.Gly955Val	Unknown	1	1
c.2903C>T	p.Pro968Leu	Unknown	1			1
c.2915T>C	p.Val972Ala	Unknown	2	2
c.2949T>G	p.His983Gln	Unknown	2			2
c.2980G>A	p.Glu994Lys	Unknown	1	1
c.3009G>T	p.Lys1003Asn	Unknown	1	1
c.3035C>T	p.Thr1012Met	Benign	1	1
c.3115G>A	p.Val1039Met	Benign	1	1
c.3158C>A	p.Ser1053Tyr	Unknown	1	1
c.3178C>A	p.Arg1060Ser	Unknown	2	1	1
c.3203C>T	p.Ala1068Val	Unknown	1		1
c.3236A>C	p.Lys1079Thr	Unknown	1		1
c.3296C>T	p.Ala1099Val	Unknown	1		1
c.3322C>A	p.Leu1108Met	Unknown	1	1
c.3331G>A	p.Val1111Met	Unknown	1			1
c.3337_3338delinsAA	p,Arg1113Glu	Unknown	1	1
c.3358C>T	p.Arg1120Trp	Unknown	1		1
c.3359G>A	p.Arg1120Gln	Unknown	1		1
c.3416C>T	p.Pro1139Leu	Unknown	1		1
c.3421G>A	p.Asp1141Asn	Unknown	1		1
c.3431C>T	p.Pro1144Leu	Unknown	1	1
c.3481G>A	p.Glu1161Lys	Unknown	1		1
c.3482A>C	p.Glu1161Ala	Unknown	1		1
c.3550G>T	p.Gly1184Trp	Unknown	1		1
c.3579C>A	p.Phe1193Leu	Unknown	1		1
c.3605delG	p.Gly1202GlufsTer56	Loss of function	1		1
c.3626G>A	p.Arg1209Gln	Unknown	1			1
c.3653C>A	p.Pro1218His	Unknown	1	1
c.3692G>A	p.Arg1231Gln	Benign	3	3
c.3694G>T	p.Asp1232Tyr	Unknown	1		1
c.3713A>G	p.Gln1238Arg	Unknown	1		1
c.3775T>A	p.Cys1259Ser	Unknown	1	1
c.3806G>C	p.Gly1269Ala	Gain of function	1	1
c.3903C>A	p.Phe1301Leu	Unknown	1		1
c.3928dupA	p.Thr1310AsnfsTer62	Loss of function	1		1
c.3938+1G>A	Splicing site	Unknown	1		1
c.3960G>A	p.Trp1320Ter	Loss of function	1			1
c.3971C>A	p.Ser1324Tyr	Unknown	1		1
c.3980A>G	p.Tyr1327Cys	Unknown	1	1
c.4040G>A	p.Arg1347Gln	Unknown	2	2
c.4072G>A	p.Val1358Ile	Unknown	1		1
c.4074-1G>A	Splicing site	Unknown	1		1
c.4097_4098delGG	p.Trp1366SerfsTer5	Loss of function	1	1
c.4109C>A	p.Pro1370His	Unknown	1			1
c.4150_4152delinsAAC	p.Glu1384Asn	Unknown	1	1
c.4156T>C	p.Cys1386Arg	Unknown	1	1
c.4196T>C	p.Ile1399Thr	Unknown	1	1
c.4200A>C	p.Glu1400Asp	Unknown	1				1
c.4219G>C	p.Glu1407Gln	Unknown	1	1
c.4223A>G	p.Glu1408Gly	Unknown	1			1
c.4241G>A	p.Arg1414Lys	Unknown	1	1
c.4255G>A	p.Glu1419Lys	Benign	4	2	2
c.4261delG	p.Val1421PhefsTer56	Loss of function	1		1
c.4261dupG	p.Val1421GlyfsTer47	Loss of function	1	1
c.4282C>G	p.Gln1428Glu	Unknown	2	2
c.4303_4305delGAG	p.Glu1435del	Benign	3		3
c.4306C>T	p.Arg1436Cys	Unknown	1		1
c.4324C>T	p.Pro1442Ser	Unknown	2	2
c.4357G>A	p.Ala1453Thr	Unknown	2	2
c.4367C>T	p.Pro1456Leu	Unknown	2	2
c.4375G>T	p.Ala1459Ser	Unknown	1		1
c.4390C>G	p.Arg1464Gly	Unknown	1	1
c.4522G>A	p.Gly1508Ser	Unknown	1		1
c.4526C>A	p.Ser1509Tyr	Unknown	1	1
c.4567G>T	p.Ala1523Ser	Unknown	1		1
c.4590G>A	p.Arg1530Arg	Unknown	1	1
c.4633G>A	p.Val1545Ile	Unknown	1		1
c.4636G>A	p.Ala1546Thr	Unknown	1	1
c.4703A>C	p.Glu1568Ala	Unknown	1	1
c.4711C>A	p.Leu1571Met	Unknown	1		1
c.4739G>A	p.Gly1580Glu	Unknown	1			1
c.4753G>A	p.Gly1585Ser	Unknown	1	1
c.4767G>T	p.Gln1589His	Unknown	1		1
c.4795C>T	p.Pro1599Ser	Unknown	2	1	1
c.4859C>T	p.Pro1620Leu	Unknown	1			1
BRAF
c.89_100delGCGCCGGCGCCG	p.Gly30_Ala33del	Unknown	2	1	1
c.95_100delGCGCCG	p.Gly32_Ala33del	Benign	3	1		2
c.95_100dupGCGCCG	p.Gly32_Ala33dup	Benign	2	1	1
c.131C>T	p.Pro44Leu	Unknown	1			1
c.136G>A	p.Glu46Lys	Unknown	1			1
c.139-2A>T	Splicing site	Unknown	1		1
c.169A>T	p.Thr57Ser	Unknown	1			1
c.206G>T	p.Gly69Val	Unknown	1	1
c.236T>C	p.Leu79Pro	Unknown	1	1
c.305C>A	p.Ser102Tyr	Unknown	1	1
c.310G>A	p.Gly104Arg	Unknown	1	1
c.316G>T	p.Gly106Ter	Loss of function	1	1
c.379A>T	p.Ser127Cys	Unknown	1	1
c.386C>T	p.Ser129Leu	Unknown	1	1
c.394C>T	p.Pro132Ser	Unknown	1	1
c.449A>G	p.Lys150Arg	Unknown	1	1
c.504+1G>A	Splicing site	Unknown	1	1
c.536A>G	p.Asp179Gly	Unknown	1		1
c.541C>A	p.Leu181Ile	Unknown	1	1
c.558G>T	p.Met186Ile	Unknown	1		1
c.572T>A	p.Ile191Asn	Unknown	1		1
c.575C>G	p.Pro192Arg	Unknown	1			1
c.607G>T	p.Gly203Ter	Loss of function	1	1
c.646T>A	p.Trp216Arg	Unknown	1	1
c.711+1G>T	Splicing site	Unknown	1			1
c.731C>T	p.Thr244Ile	Unknown	1			1
c.735delA	p.Ala246HisfsTer33	Loss of function	1		1
c.752delG	p.Cys251PhefsTer28	Loss of function	1	1
c.770A>G	p.Gln257Arg	Gain of function	1	1
c.805C>T	p.His269Tyr	Unknown	1	1
c.841G>A	p.Val281Ile	Unknown	1		1
c.875C>G	p.Ser292Cys	Unknown	1	1
c.952C>T	p.Pro318Ser	Unknown	1			1
c.970delG	p.Asp324ThrfsTer48	Loss of function	1	1
c.1001C>T	p.Pro334Leu	Unknown	1				1
c.1016C>T	p.Ser339Phe	Unknown	1			1
c.1024A>G	p.Ile342Val	Unknown	1		1
c.1033_1034delinsTA	p.Pro345Tyr	Unknown	1	1
c.1040G>A	p.Arg347Gln	Unknown	1				1
c.1078C>T	p.Arg360Ter	Loss of function	1		1
c.1079G>C	p.Arg360Pro	Unknown	1	1
c.1084C>T	p.Arg362Ter	Loss of function	1	1
c.1085G>A	p.Arg362Gln	Unknown	1		1
c.1088C>T	p.Ser363Phe	Unknown	1		1
c.1165C>T	p.Arg389Cys	Unknown	1		1
c.1169G>T	p.Gly390Val	Unknown	1	1
c.1207_1208dupCC	p.Ala404LeufsTer8	Loss of function	1		1
c.1208delC	p.Pro403LeufsTer8	Loss of function	3		3
c.1208dupC	p.Ala404CysfsTer9	Loss of function	2		2
c.1214C>T	p.Ser405Leu	Unknown	1			1
c.1294dupT	p.Ser432PhefsTer12	Loss of function	1	1
c.1363G>T	p.Gly455Trp	Unknown	1	1
c.1369A>G	p.Ile457Val	Unknown	1		1
c.1391G>T	p.Gly464Val	Gain of function	1	1
c.1394C>G	p.Ser465Cys	Unknown	1	1
c.1394C>T	p.Ser465Phe	Unknown	1	1
c.1396G>A	p.Gly466Arg	Loss of function	1	1
c.1397G>A	p.Gly466Glu	Loss of function	4		1	3
c.1397G>C	p.Gly466Ala	Loss of function	1	1
c.1397G>T	p.Gly466Val	Loss of function	8	4	3	1
c.1405G>A	p.Gly469Arg	Gain of function	4	2	1	1
c.1405G>C	p.Gly469Arg	Gain of function	1	1
c.1405G>T	p.Gly469Ter	Loss of function	1	1
c.1406G>C	p.Gly469Ala	Gain of function	6	4	1	1
c.1406G>T	p.Gly469Val	Gain of function	5	5
c.1408delA	p.Thr470GlnfsTer13	Loss of function	1		1
c.1447A>G	p.Lys483Glu	Gain of function	5	2	2	1
c.1454T>G	p.Leu485Trp	Gain of function	1	1
c.1457_1471delATGTGACAGCACCTA	p.Asn486_Pro490del	Gain of function	2			2
c.1457_1462delATGTGA	p.Asn486_Val487del	Unknown	1	1
c.1497A>C	p.Lys499Asn	Gain of function	1		1
c.1501G>A	p.Glu501Lys	Loss of function	1		1
c.1505T>A	p.Val502Glu	Unknown	1	1
c.1529_1530delAT	p.His510ArgfsTer23	Loss of function	1	1
c.1592G>T	p.Trp531Leu	Unknown	1	1
c.1597G>A	p.Glu533Lys	Unknown	1	1
c.1604C>T	p.Ser535Phe	Unknown	1	1
c.1667T>C	p.Ile556Thr	Unknown	1	1
c.1688G>T	p.Gly563Val	Unknown	1	1
c.1726G>C	p.Asp576His	Unknown	1	1
c.1742A>G	p.Asn581Ser	Unknown	4	3		1
c.1743T>A	p.Asn581Lys	Loss of function	1	1
c.1780G>A	p.Asp594Asn	Loss of function	4	2	2
c.1781A>G	p.Asp594Gly	Loss of function	10	3	7
c.1786G>C	p.Gly596Arg	Loss of function	1		1
c.1786G>A	p.Gly596Ser	Loss of function	1			1
c.1786G>T	p.Gly596Cys	Loss of function	1	1
c.1789C>A	p.Leu597Ile	Unknown	1	1
c.1789C>G	p.Leu597Val	Gain of function	1	1
c.1789_1790delCT	p.Leu597SerfsTer14	Loss of function	1	1
c.1790T>A	p.Leu597Gln	Gain of function	1		1
c.1790T>G	p.Leu597Arg	Gain of function	1	1
c.1794_1796dupTAC	p.Thr599dup	Gain of function	1			1
c.1798G>A	p.Val600Met	Gain of function	4			4
c.1798_1799delGTinsAA	p.Val600Lys	Gain of function	6			6
c.1799_1811delTGAAATCTCGATG	p.Val600GlyfsTer46	Loss of function	4			4
c.1799T>A	p.Val600Glu	Gain of function	172	35	94	43
c/1799_1800delinsAA	p.Val600Glu	Gain of function	1			1
c.1801A>G	p.Lys601Glu	Gain of function	3		2	1
c.1802_1810delAATCTCGAT	p.Lys601_Trp604delinsArg	Unknown	2		2
c.1810T>G	p.Trp604Gly	Unknown	1		1
c.1812G>T	p.Trp604Cys	Unknown	1			1
c.1816G>A	p.Gly606Arg	Unknown	1	1
c.1819T>A	p.Ser607Thr	Unknown	1		1
c.1849A>T	p.Ile617Phe	Unknown	1			1
c.1858A>C	p.Met620Leu	Unknown	2	2
c.1952C>A	p.Thr651Asn	Unknown	1		1
c.1980C>A	p.Asn660Lys	Unknown	2	2
c.2008_2009delGG	p.Gly670ThrfsTer10	Loss of function	2	2
c.2011C>T	p.Arg671Ter	Loss of function	1	1
c.2087G>T	p.Cys696Phe	Unknown	1	1
c.2109G>C	p.Glu703Asp	Unknown	1	1
c.2122C>T	p.Pro708Ser	Unknown	1			1
c.2134G>A	p.Ala712Thr	Benign	1		1
c.2191C>T	p.Pro731Ser	Gain of function	1		1
c.2285C>G	p.Ala762Gly	Unknown	1	1
EGFR
c.70G>T	p.Ala24Ser	Unknown	1	1
c.122T>C	p.Leu41Ser	Unknown	1			1
c.133G>A	p.Glu45Lys	Unknown	1			1
c.185T>G	p.Leu62Arg	Unknown	1	1
c.293G>A	p.Arg98Gln	Unknown	1		1
c.347C>T	p.Ser116Phe	Unknown	1			1
c.353C>A	p.Ala118Asp	Unknown	1			1
c.379G>A	p.Ala127Thr	Benign	1	1
c.426A>C	p.Glu142Asp	Unknown	1		1
c.434A>C	p.His145Pro	Unknown	1	1
c.506G>T	p.Ser169Ile	Unknown	1	1
c.517C>T	p.Leu173Phe	Unknown	1	1
c.563A>T	p.Gln188Leu	Unknown	1	1
c.643T>A	p.Cys215Ser	Unknown	1	1
c.664C>T	p.Arg222Cys	Gain of function	1		1
c.673G>T	p.Gly225Cys	Unknown	1	1
c.731G>A	p.Arg244Gln	Unknown	1		1
c.769G>A	p.Glu257Lys	Unknown	1		1
c.808T>C	p.Tyr270His	Unknown	1		1
c.844G>A	p.Glu282Lys	Unknown	1		1
c.866C>T	p.Ala289Val	Gain of function	2	2
c.879G>T	p.Lys293Asn	Unknown	1		1
c.910C>T	p.His304Tyr	Unknown	1	1
c.1039G>A	p.Asp347Asn	Unknown	1		1
c.1079A>G	p.Lys360Arg	Unknown	1	1
c.1082delA	p.Asn361ThrfsTer35	Loss of function	1		1
c.1118C>A	p.Pro373Gln	Unknown	1	1
c.1192G>A	p.Val398Ile	Benign	1	1
c.1215G>T	p.Leu405Phe	Unknown	1		1
c.1256C>A	p.Ala419Asp	Unknown	1	1
c.1297C>T	p.His433Tyr	Unknown	1	1
c.1299T>A	p.His433Gln	Unknown	1	1
c.1316C>T	p.Ala439Val	Unknown	1		1
c.1331A>G	p.Asn444Ser	Unknown	1		1
c.1334delT	p.Ile445LysfsTer12	Loss of function	1			1
c.1346G>T	p.Gly449Val	Unknown	1	1
c.1355C>T	p.Ser452Phe	Unknown	1			1
c.1374T>G	p.Asp458Glu	Unknown	1	1
c.1375G>A	p.Gly459Arg	Unknown	2	1	1
c.1394G>A	p.Gly465Glu	Unknown	1			1
c.1426A>G	p.Asn476Asp	Unknown	1		1
c.1448C>T	p.Thr483Ile	Unknown	1	1
c.1451C>T	p.Ser484Phe	Unknown	1			1
c.1481G>C	p.Arg494Thr	Unknown	1	1
c.1496G>T	p.Cys499Phe	Unknown	1	1
c.1529G>T	p.Cys510Phe	Unknown	1	1
c.1532C>A	p.Ser511Tyr	Benign	4	3	1
c.1532C>T	p.Ser511Phe	Unknown	2			2
c.1592G>A	p.Arg531Gln	Unknown	1	1
c.1599G>T	p.Arg533Ser	Unknown	1	1
c.1609G>T	p.Asp537Tyr	Unknown	1	1
c.1625T>C	p.Leu542Pro	Unknown	1			1
c.1632T>C	p.Gly544Gly	Benign	1	1
c.1720C>T	p.Arg574Trp	Unknown	1		1
c.1750C>T	p.His584Tyr	Unknown	1			1
c.1838C>T	p.Ala613Val	Unknown	1		1
c.1952T>C	p.Val651Ala	Unknown	1			1
c.1960delC	p.Leu654SerfsTer51	Loss of function	1		1
c.2002A>T	p.Met668Leu	Unknown	1	1
c.2065G>C	p.Val689Leu	Gain of function	1	1
c.2075T>A	p.Leu692His	Unknown	1		1
c.2101C>T	p.Gln701Ter	Loss of function	1		1
c.2125G>A	p.Glu709Lys	Gain of function	1	1
c.2126A>G	p.Glu709Gly	Gain of function	1	1
c.2148A>T	p.Lys716Asn	Unknown	2	2
c.2155G>T	p.Gly719Cys	Gain of function	3	3
c.2156G>C	p.Gly719Ala	Gain of function	3	3
c.2171G>A	p.Gly724Asp	Unknown	1	1
c.2214_2215insAAAATTCCCGTCGCTATC	p.Ile740_Lys745dup	Gain of function	1	1
c.2232_2249delinsAAA	p.Glu746_Ala750del	Gain of function	18	18
c.2232_2254del	p.Glu746_Ser752delinsAla	Gain of function	1	1
c.2235_2236del	p.Glu746IlefsTer16	Loss of function	1	1
c.2235_2249delGGAATTAAGAGAAGC	p.Glu746_Ala750del	Gain of function	27	27
c.2236_2244delGAATTAAGA	p.Glu746_Arg748del	Gain of function	2	2
c.2236_2250delGAATTAAGAGAAGCA	p.Glu746_Ala750del	Gain of function	8	8
c.2237_2254delAATTAAGAGAAGCAACAT	p.Glu746_Ser752delinsVal	Gain of function	4	4
c.2238_2249delATTAAGAGAAGC	p.Leu747_Ala750del	Gain of function	2	2
c.2238_2252delATTAAGAGAAGCAAC	p.Leu747_Thr751del	Gain of function	5	5
c.2239T>G	p.Leu747Val	Gain of function	1		1
c.2239_2248delinsC	p.Leu747_Ala750delinsPro	Gain of function	2	2
c.2239_2252delinsCA	p.Leu747_Thr751delinsGln	Gain of function	1	1
c.2239_2264delinsGCCAA	p.Leu747_Ala755delinsAlaAsn	Gain of function	1	1
c.2240_2254del	p.Leu747_Thr751del	Gain of function	1	1
c.2240_2257delTAAGAGAAGCAACATCTC	p.Leu747_Pro753delins	Gain of function	5	5
c.2242_2251del	p.Arg748HisfsTer15	Loss of function	1	1
c.2249dupC	p.Thr751AsnfsTer12	Loss of function	1	1
c.2253_2276delATCTCCGAAAGCCAACAAGGAAAT	p.Ser752_Ile759del	Gain of function	1	1
c.2254_2266delTCTCCGAAAGCCA	p.Ser752ThrfsTer10	Loss of function	1	1
c.2255C>T	p.Ser752Phe	Gain of function	3	3
c.2270A>T	p.Lys757Met	Gain of function	1	1
c.2276T>G	p.Ile759Ser	Unknown	1			1
c.2293G>A	p.Val765Met	Unknown	1	1
c.2299G>A	p.Ala767Thr	Gain of function	1	1
c.2300_2301insCAGCGTGGA	p.Ser768_Asp770dup	Gain of function	2	2
c.2300_2308dupCCAGCGTGG	p.Ala767_Val769dup	Gain of function	4	4
c.2301_2302insAGCGTA	p.Ser768_Val769dup	Gain of function	1	1
c.2302_2303insGCGTGGACAACCCCC	p.Pro772_His773insArgValAspAsnPro	Gain of function	1	1
c.2303G>A	p.Ser768Asn	Gain of function	2	2
c.2303G>T	p.Ser768Ile	Gain of function	2	2
c.2305G>A	p.Val769Met	Gain of function	2		2
c.2308_2309insACAACCCCC	p.Asn771_His773dup	Gain of function	1	1
c.2308_2309insGTT	p.Asp770delinsGlyTyr	Gain of function	1	1
c.2309_2310insCAACCCCGG	p.Pro772_His773insGlyAsnPro	Gain of function	2	2
c.2310_2311insGGC	p.Asp770_Asn771insGly	Gain of function	2	2
c.2311A>T	p.Asn771Tyr	Unknown	1	1
c.2312A>T	p.Asn771Ile	Unknown	1	1
c.2310_2311insGGT	p.Asp770_Asn771insGly	Gain of function	1	1
c.2320G>A	p.Val774Met	Gain of function	1	1
c.2326_2327delinsTC	p.Arg776Ser	Gain of function	1	1
c.2335G>T	p.Gly779Cys	Unknown	1	1
c.2336G>T	p.Gly779Val	Unknown	1	1
c.2369C>T	p.Thr790Met	Gain of function	10	9	1
c.2386G>A	p.Gly796Ser	Gain of function	1	1
c.2390G>C	p.Cys797Ser	Gain of function	1	1
c.2399A>G	p.Asp800Gly	Unknown	1	1
c.2425A>T	p.Ile809Phe	Unknown	1			1
c.2436G>T	p.Gln812His	Unknown	1	1
c.2480A>T	p.Tyr827Phe	Unknown	1			1
c.2492G>A	p.Arg831His	Unknown	1		1
c.2495G>A	p.Arg832His	Unknown	1		1
c.2505C>A	p.His835Gln	Unknown	1		1
c.2507G>A	p.Arg836His	Unknown	1		1
c.2527G>T	p.Val843Leu	Unknown	3	1	2
c.2543C>T	p.Pro848Leu	Benign	3	2	1
c.2572C>A	p.Leu858Met	Gain of function	1	1
c.2572_2573delinsAG	p.Leu858Arg	Gain of function	1	1
c.2573T>A	p.Leu858Gln	Gain of function	1	1
c.2573T>G	p.Leu858Arg	Gain of function	57	56	1
c.2582T>A	p.Leu861Gln	Gain of function	7	7
c.2582T>G	p.Leu861Arg	Gain of function	2	2
c.2612C>A	p.Ala871Glu	Gain of function	1	1
c.2633T>C	p.Ile878Thr	Unknown	1		1
c.2701G>A	p.Gly901Arg	Unknown	1		1
c.2701+1delG	Splicing site	Unknown	1		1
c.2701+2T>A	Splicing site	Unknown	1		1
c.2746G>A	p.Asp916Asn	Unknown	2		1	1
c.2777T>A	p.Ile926Asn	Unknown	1		1
c.2841G>A	p.Met947Ile	Unknown	1		1
c.2870G>A	p.Ser957Asn	Unknown	1		1
c.2872C>T	p.Arg958Cys	Unknown	1	1
c.2873G>A	p.Arg958His	Unknown	1			1
c.2884C>T	p.Arg962Cys	Unknown	2		2
c.2885G>A	p.Arg962His	Unknown	2	1	1
c.2885G>T	p.Arg962Leu	Unknown	2	2
c.2952T>G	p.Asp984Glu	Unknown	1			1
c.2963A>C	p.His988Pro	Benign	1	1
c.2977A>G	p.Tyr993Ala	Unknown	1	1
c.2981A>T	p.Asp994Val	Unknown	1	1
c.2993A>T	p.Tyr998Phe	Unknown	1		1
c.2996G>A	p.Arg999His	Unknown	3	1		1	1
c.3040G>T	p.Asp1014Tyr	Unknown	1	1
c.3043G>A	p.Glu1015Lys	Unknown	1	1
c.3052A>G	p.Ile1018Val	Unknown	1	1
c.3063G>T	p.Gln1021His	Unknown	1	1
c.3065G>C	p.Gly1022Ala	Unknown	1				1
c.3091C>T	p.Arg1031Trp	Unknown	1	1
c.3094A>G	p.Thr1032Ala	Unknown	1	1
c.3106A>T	p.Ser1036Cys	Unknown	1		1
c.3130A>T	p.Asn1044Tyr	Unknown	1	1
c.3142G>T	p.Ala1048Ser	Unknown	1	1
c.3161G>T	p.Gly1054Val	Unknown	1	1
c.3200A>G	p.Gln1067Arg	Unknown	1	1
c.3223G>A	p.Gly1075Ser	Unknown	1	1
c.3289G>A	p.Val1097Ile	Unknown	1		1
c.3304G>A	p.Ala1102Thr	Unknown	1	1
c.3304G>T	p.Ala1102Ser	Unknown	1	1
c.3346A>T	p.Asn1116Tyr	Unknown	1	1
c.3364G>T	p.Asp1122Tyr	Unknown	1			1
c.3373_3387del	p.Tyr1125_His1129del	Unknown	1	1
c.3461C>G	p.Pro1154Arg	Unknown	1	1
c.3629C>T	p.Ala1210Val	Benign	3	1	1	1
ERBB2
c.53C>T	p.Pro18Leu	Unknown	1			1
c.77G>T	p.Cys26Phe	Unknown	1	1
c.79A>C	p.Thr27Pro	Unknown	1		1
c.118G>A	p.Glu40Lys	Unknown	1		1
c.130G>A	p.Asp44Asn	Unknown	1	1
c.140G>A	p.Arg47His	Unknown	1		1
c.170A>G	p.Gln57Arg	Unknown	1	1
c.182A>C	p.Glu61Ala	Unknown	2	2
c.236A>C	p.Glu79Ala	Unknown	1	1
c.259G>T	p.Ala87Ser	Unknown	1		1
c.343G>A	p.Ala115Thr	Unknown	1		1
c.364C>T	p.Pro122Ser	Unknown	1			1
c.382C>T	p.Pro128Ser	Unknown	1			1
c.392G>T	p.Gly131Val	Unknown	1	1
c.400C>G	p.Pro134Ala	Unknown	1				1
c.457G>C	p.Val153Leu	Unknown	1	1
c.563G>A	p.Arg188His	Unknown	1	1
c.569G>C	p.Arg190Pro	Unknown	1		1
c.575G>T	p.Cys192Phe	Unknown	1	1
c.608G>A	p.Arg203His	Unknown	1				1
c.661G>A	p.Ala221Thr	Unknown	1		1
c.829G>A	p.Asp227Asn	Unknown	1	1
c.929C>T	p.Ser310Phe	Gain of function	6	3	3
c.994G>C	p.Glu332Gln	Unknown	1	1
c.1019G>A	p.Arg340Gln	Unknown	4	2	2
c.1056G>T	p.Glu352Asp	Unknown	1	1
c.1154C>T	p.Pro385Leu	Unknown	1		1
c.1157C>A	p.Ala386Asp	Benign	35	23	10	2
c.1269C>A	p.Ser423Arg	Unknown	1	1
c.1279A>G	p.Asn427Asp	Unknown	1		1
c.1295G>A	p.Arg432Gln	Unknown	3	2	1
c.1297G>A	p.Gly433Arg	Unknown	1			1
c.1340G>T	p.Gly447Val	Unknown	2	2
c.1356G>T	p.Trp452Cys	Benign	2		2
c.1460G>A	p.Arg487Gln	Unknown	1	1
c.1466C>T	p.Pro489Leu	Gain of function	9	3	6
c.1475C>G	p.Ala492Gly	Unknown	1	1
c.1522G>A	p.Gly508Ser	Unknown	1			1
c.1550G>C	p.Arg517Pro	Unknown	1	1
c.1568C>T	p.Pro523Leu	Unknown	1			1
c.1607G>A	p.Arg536Gln	Unknown	1			1
c.1620C>A	p.Cys540Ter	Loss of function	1		1
c.1644G>T	p.Gln548His	Unknown	1	1
c.1677C>G	p.His559Gln	Unknown	1		1
c.1684C>T	p.Pro562Ser	Unknown	1			1
c.1685C>T	p.Pro562Leu	Unknown	1	1
c.1895A>G	p.His632Arg	Unknown	1	1
c.1898C>T	p.Ser633Phe	Benign	1		1
c.1901G>T	p.Cys634Phe	Unknown	1	1
c.1914T>A	p.Asp638Glu	Unknown	1	1
c.1930G>A	p.Ala644Thr	Unknown	1		1
c.1960A>G	p.Ile654Val	Benign	33	18	12	1	2
c.2002G>A	p.Gly668Arg	Unknown	1			1
c.2033G>A	p.Arg678Gln	Gain of function	5		5
c.2094G>T	p.Glu698Asp	Unknown	1		1
c.2180G>C	p.Gly727Ala	Gain of function	1	1
c.2183C>G	p.Ser728Cys	Unknown	1	1
c.2264T>C	p.Leu755Ser	Gain of function	1		1
c.2268G>T	p.Arg756Ser	Unknown	1	1
c.2305G>T	p.Asp769Tyr	Gain of function	2		2
c.2310_2311insGCATACGTGATG	p.Glu770_Ala771insAlaTyrValMet	Gain of function	1	1
c.2314_2325dupTACGTGATGGCT	p.Tyr772_Ala775dup	Gain of function	1	1
c.2313_2324dupATACGTGATGGC	p.Ala775_Gly776insTyrValMetAla	Gain of function	5	5
c.2325_2326insTCCGTGATGGCT	p.Ala775_Gly776insSerValMetAla	Gain of function	1	1
c.2326G>T	p.Gly776Cys	Unknown	2	2
c.2326_2327insTAT	p.Gly776delinsValCys	Gain of function	1	1
c.2329G>T	p.Val777Leu	Gain of function	1		1
c.2331_2332insTGT	p.Val777_Gly778insCys	Gain of function	2	2
c.2333G>T	p.Gly778Val	Unknown	1	1
c.2348C>T	p.Ser783Phe	Unknown	1	1
c.2431C>T	p.Arg811Trp	Unknown	1		1
c.2432G>C	p.Arg811Pro	Unknown	1	1
c.2456C>T	p.Ser819Phe	Unknown	1	1
c.2509delG	p.Glu837ArgfsTer74	Loss of function	1		1
c.2521C>G	p.Leu841Val	Gain of function	1		1
c.2524G>A	p.Val842Ile	Gain of function	5		5
c.2634T>G	p.His878Gln	Unknown	1	1
c.2786G>A	p.Arg929Gln	Benign	1		1
c.2790G>T	p.Glu930Asp	Benign	1	1
c.2811G>T	p.Lys937Asn	Unknown	1		1
c.2883T>G	p.Ile961Met	Unknown	1		1
c.2969A>T	p.Gln990Leu	Unknown	1	1
c.3016C>T	p.Arg1006Cys	Benign	1		1
c.3044G>A	p.Gly1015Glu	Unknown	6		5	1
c.3121G>A	p.Gly1041Ser	Unknown	1	1
c.3166G>A	p.Gly1056Ser	Unknown	1	1
c.3167G>A	p.Gly1056Asp	Unknown	1	1
c.3239G>T	p.Gly1080Val	Unknown	1		1
c.3310C>T	p.His1104Tyr	Unknown	1		1
c.3371C>T	p.Thr1124Ile	Unknown	1			1
c.3375T>A	p.Asp1125Glu	Unknown	1	1
c.3403C>T	p.Pro1135Ser	Unknown	3	2	1
c.3482G>A	p.Arg1161Gln	Unknown	1	1
c.3544A>G	p.Lys1182Glu	Unknown	1	1
c.3571G>A	p.Val1191Met	Unknown	1	1
c.3583G>T	p.Glu1195Ter	Loss of function	1	1
c.3613C>T	p.Pro1205Ser	Unknown	4	4
c.3647C>A	p.Ala1216Asp	Benign	18	12	6
c.3672C>G	p.Asp1224Glu	Unknown	2	1		1
c.3689G>A	p.Arg1230Gln	Unknown	1	1
KIT
c.23G>T	p.Trp8Leu	Unknown	1	1
c.101C>T	p.Pro34Leu	Benign	1		1
c.146G>T	p.Arg49Leu	Unknown	2		2
c.151G>T	p.Gly51Cys	Unknown	1	1
c.157G>A	p.Glu53Lys	Unknown	1		1
c.164G>A	p.Arg55Lys	Unknown	1	1
c.200C>G	p.Thr67Ser	Unknown	2	2
c.203T>C	p.Phe68Ser	Unknown	1	1
c.226G>A	p.Glu76Lys	Unknown	1			1
c.253G>A	p.Glu85Lys	Unknown	1				1
c.335G>A	p.Arg112Lys	Unknown	2	2
c.341C>A	p.Pro114His	Unknown	1	1
c.349C>A	p.Leu117Ile	Unknown	3	1		1	1
c.364C>T	p.Arg122Cys	Unknown	1		1
c.403C>T	p.Arg135Cys	Unknown	1		1
c.448G>T	p.Gly150Trp	Unknown	1		1
c.521G>A	p.Ser174Asn	Unknown	1		1
c.532G>A	p.Ala178Thr	Benign	1		1
c.541C>T	p.Arg181Trp	Unknown	1		1
c.567C>A	p.Asp189Glu	Unknown	1	1
c.576delC	p.Lys193SerfsTer10	Loss of function	1		1
c.586C>A	p.Leu196Met	Unknown	1	1
c.590C>T	p.Ser197Leu	Unknown	1		1
c.628G>T	p.Ala210Ser	Unknown	1	1
c.650C>A	p.Ser217Tyr	Unknown	1				1
c.701C>T	p.Thr234Ile	Unknown	1		1
c.703A>G	p.Ile235Val	Unknown	1		1
c.716C>G	p.Ser239Cys	Unknown	1	1
c.755A>C	p.Gln252Pro	Unknown	1		1
c.757-1G>T	Splicing site	Unknown	1	1
c.771G>T	p.Glu257Asp	Unknown	2		2
c.821C>T	p.Thr274Met	Unknown	2	2
c.836C>T	p.Ser279Leu	Unknown	1	1
c.906_911delAACAAC	p.Thr303_Thr304del	Unknown	1		1
c.944T>C	c.944T>C	Unknown	1		1
c.949C>G	p.Pro317Ala	Unknown	1	1
c.962C>A	p.Thr321Asn	Unknown	1	1
c.985G>A	p.Glu329Lys	Unknown	1		1
c.1021C>A	p.Pro341Thr	Unknown	1	1
c.1124G>T	p.Ser375Ile	Unknown	1	1
c.1126G>A	p.Glu376Lys	Unknown	1			1
c.1126G>C	p.Glu376Gln	Unknown	1	1
c.1133A>G	p.His378Arg	Unknown	1	1
c.1144delT	p.Leu382Ter	Loss of function	1			1
c.1153A>C	p.Thr385Pro	Unknown	1	1
c.1156G>A	p.Glu386Lys	Unknown	1		1
c.1166C>T	p.Thr389Ile	Unknown	1			1
c.1183T>A	p.Ser395Thr	Unknown	1	1
c.1187A>G	p.Asn396Ser	Unknown	1	1
c.1195G>A	p.Val399Ile	Unknown	4	1		2	1
c.1199A>G	p.Asn400Ser	Benign	3	3
c.1207A>G	p.Ile403Val	Unknown	1				1
c.1228A>T	p.Asn410Tyr	Unknown	2	2
c.1253_1255delACG	p.(Asp419del)	Gain of function	1				1
c.1255G>A	p.Asp419Asn	Unknown	1		1
c.1255G>T	p.Asp419Tyr	Unknown	2	2
c.1286T>A	p.Val429Glu	Unknown	2		2
c.1380G>T	p.Gln460His	Unknown	1	1
c.1433T>A	p.Ile478Lys	Unknown	1	1
c.1435G>T	p.Asp479Tyr	Unknown	1	1
c.1455C>A	p.His485Gln	Unknown	1	1
c.1460G>A	p.Gly487Asp	Unknown	1		1
c.1475delA	p.Lys492ArgfsTer35	Loss of function	1	1
c.1482C>A	p.Tyr494Ter	Loss of function	1			1
c.1504_1509dupGCCTAT	p.Ala502_Tyr503dup	Gain of function	1				1
c.1507T>A	p.Tyr503Asn	Unknown	1	1
c.1566C>A	p.Phe522Leu	Unknown	1		1
c.1579A>G	p.Ile527Val	Unknown	1	1
c.1588G>A	p.Val530Ile	Benign	3		3
c.1594G>A	p.Val532Ile	Benign	3	1	2
c.1601G>T	p.Gly534Val	Unknown	1	1
c.1647G>T	p.Gln549His	Unknown	1	1
c.1648-2_1672delAGAAACCCATGTATGAAGTACAGTGGA	p.Lys550_Lys558del	Gain of function	1				1
c.1649_1675delAACCCATGTATGAAGTACAGTGGAAGG	p.Lys550_Val559delinsIle	Gain of function	1				1
c.1654_1671delATGTATGAAGTACAGTGG	p.Met552_Trp557del	Gain of function	1				1
c.1655_1675delTGTATGAAGTACAGTGGAAGG	p.Met552_Val559delinsIle	Gain of function	1				1
c.1657_1683delGTATGAAGTACAGTGGAAGGTTGTTGA	p.Tyr553_Glu561del	Gain of function	1				1
c.1660_1665delGAAGTA	p.Glu554_Val555del	Gain of function	1				1
c.1662_1688delAGTACAGTGGAAGGTTGTTGAGGAGAT	p.Val555_Ile563del	Gain of function	1				1
c.1669T>A	p.Trp557Arg	Gain of function	2				2
c.1669T>G	p.Trp557Gly	Gain of function	1			1
c.1669_1683delAGTGGAAGGTTGTTG	p.Trp557_Glu561del	Gain of function	1		1
c.1669_1725delTGGAAGGTTGTTGAGGAGATAAATGGAAACAATTATGTTTACATAGACCCAACACAA	p.Trp557_Gln575del	Gain of function	1				1
c.1673_1693delAGGTTGTTGAGGAGATAAATG	p.Lys558_Gly565delinsArg	Gain of function	1				1
c.1676T>C	p.Val559Ala	Gain of function	2				2
c.1676T>G	p.Val559Gly	Gain of function	3				3
c.1679_1681delTTG	p.Val560del	Gain of function	4				4
c.1679_1720delTTGAGGAGATAAATGGAAACAATTATGTTTACATAGACCCAA	p.Val560_Thr574delinsAla	Gain of function	1				1
c.1679T>A	p.Val560Asp	Gain of function	1				1
c.1698_1699insG+c.1701_1728delTTATGTTTACATAGACCCAACACAACTT	p.Asn567_Leu576delinsGlu	Gain of function	1				1
c.1700_1726delATTATGTTTACATAGACCCAACACAAC	p.Asn567_Leu576delinsIle	Gain of function	2				2
c.1718C>G	p.Pro573Arg	Unknown	1				1
c.1727T>C	p.Leu576Pro	Gain of function	5			4	1
c.1729C>T	p.Pro577Ser	Unknown	1			1
c.1733_1735del	p.Asp579del	Gain of function	1	1
c.1735_1737delGAT	p.Asp579del	Gain of function	1				1
c.1879+2T>C	Splicing site	Unknown	1	1
c.1879C>T	p.Pro627Ser	Unknown	1		1
c.1889A>T	p.His630Leu	Unknown	1	1
c.1920A>T	p.Glu640Asp	Unknown	1	1
c.2009C>T	p.Thr670Ile	Gain of function	1				1
c.2025T>A	p.Tyr675Ter	Loss of function	1		1
c.2026G>C	p.Gly676Arg	Unknown	1	1
c.2046G>C	p.Leu682Phe	Unknown	1	1
c.2088T>A	p.Asp696Glu	Unknown	1		1
c.2209G>A	p.Asp737Asn	Unknown	1		1
c.2233+2T>A	Splicing site	Unknown	1	1
c.2243T>C	p.Ile748Thr	Unknown	1				1
c.2281G>A	p.Glu761Lys	Unknown	1	1
c.2283G>T	p.Glu761Asp	Unknown	1	1
c.2358G>T	p.Lys786Asn	Unknown	1		1
c.2361+1G>A	Splicing site	Unknown	1		1
c.2379G>T	p.Leu793Phe	Unknown	1	1
c.2380G>A	p.Ala794Thr	Gain of function	1	1
c.2411G>A	p.Arg804Gln	Unknown	1		1
c.2458G>T	p.Asp820Tyr	Gain of function	1				1
c.2508G>T	p.Met836Ile	Unknown	1	1
c.2552A>G	p.Asp851Gly	Unknown	1		1
c.2554G>A	p.Val852Ile	Benign	1	1
c.2559G>T	p.Trp853Cys	Unknown	1	1
c.2620C>T	p.Pro874Ser	Unknown	1	1
c.2621C>T	p.Pro874Leu	Unknown	1		1
c.2663G>A	p.Arg888Gln	Unknown	2		2
c.2681_2686del	p.His894_Ala895del	Unknown	1	1
c.2683G>A	p.Ala895Thr	Unknown	1		1
c.2684C>T	p.Ala895Val	Unknown	1	1
c.2696+2T>A	Splicing site	Unknown	1		1
c.2709G>A	p.Met903Ile	Unknown	1			1
c.2731C>G	p.Pro911Ala	Unknown	1	1
c.2801A>G	p.His934Arg	Unknown	1	1
c.2836C>T	p.Arg946Ter	Loss of function	6	2	4
c.2856C>A	p.Asp952Glu	Unknown	1	1
c.2867G>A	p.Arg956Gln	Unknown	2		2
c.2876C>T	p.Ser959Phe	Unknown	1				1
c.2881G>A	p.Gly961Ser	Unknown	1			1
c.2913_2929delTGTGCACGACGATGTCT	p.Val972_Val976delinsTer70	Loss of function	1				1
c.2923G>A	p.Asp975Asn	Unknown	2	1	1
KRAS
c.27_29dupTGG	p.Gly10dup	Gain of function	1		1
c.30_35dupAGCTGG	p.Gly12_Gly13insAlaGly	Unknown	1	1
c.34G>A	p.Gly12Ser	Gain of function	27	9	17	1
c.34G>C	p.Gly12Arg	Gain of function	8	5	2		1
c.34G>T	p.Gly12Cys	Gain of function	195	160	34	1
c.35G>A	p.Gly12Asp	Gain of function	175	64	111
c.35G>C	p.Gly12Ala	Gain of function	257	226	31
c.35G>T	p.Gly12Val	Gain of function	160	86	72	2
c.37G>C	p.Gly13Arg	Gain of function	4	1	3
c.37G>T	p.Gly13Cys	Gain of function	16	15	1
c.38G>A	p.Gly13Asp	Gain of function	73	12	61
c.38_39delinsAA	p.Gly13Glu	Gain of function	1	1
c.38_39delinsTT	p.Gly13Val	Gain of function	1		1
c.40G>A	p.Val14Ile	Gain of function	1		1
c.57G>C	p.Leu19Phe	Gain of function	4	2	2
c.64C>A	p.Gln22Lys	Gain of function	3	1	2
c.79C>T	p.His27Tyr	Unknown	1			1
c.91G>A	p.Glu31Lys	Gain of function	2	2
c.100C>T	p.Pro34Ser	Unknown	1			1
c.107T>A	p.Ile36Lys	Unknown	1		1
c.149C>T	p.Thr50Ile	Unknown	1	1
c.175G>A	p.Ala59Thr	Gain of function	1		1
c.176C>G	p.Ala59Gly	Gain of function	1		1
c.179G>A	p.Gly60Asp	Gain of function	1			1
c.181C>A	p.Gln61Lys	Gain of function	9	5	4
c.182A>G	p.Gln61Arg	Gain of function	10	4	4	2
c.182A>T	p.Gln61Leu	Gain of function	3	3
c.183A>C	p.Gln61His	Gain of function	25	15	9	1
c.183A>T	p.Gln61His	Gain of function	12	7	4	1
c.184G>A	p.Glu62Lys	Unknown	2			2
c.184G>T	p.Glu62Ter	Loss of function	1		1
c.250A>G	p.Ile84Val	Unknown	1	1
c.310A>T	p.Lys104Ter	Loss of function	1		1
c.343G>C	p.Gly115Arg	Unknown	1	1
c.351A>T	p.Lys117Asn	Gain of function	6	2	4
c.362C>A	p.Pro121His	Unknown	1		1
c.436G>A	p.Ala146Thr	Gain of function	23	2	21
c.436G>C	p.Ala146Pro	Gain of function	4		4
c.437C>T	p.Ala146Val	Gain of function	10	5	5
c.490C>T	p.Arg164Ter	Benign	1	1
c.535G>A	p.Gly179Ser	Benign	1	1
c.559A>G	p.Ile187Val	Unknown	1	1
c.565A>C	p.Met189Leu	Benign	1			1
MAP2K1
c.1A>G	p.Met1?	Loss of function	1	1
c.139C>T	p.Arg47Ter	Loss of function	1	1
c.158T>C	p.Phe53Ser	Gain of function	1			1
c.167A>C	p.Gln56Pro	Gain of function	2		2
c.169A>G	p.Lys57Glu	Gain of function	1		1
c.171G>T	p.Lys57Asn	Gain of function	7	6	1
c.182G>A	p.Gly61Glu	Unknown	1	1
c.199G>A	p.Asp67Asn	Gain of function	2		2
c.235G>T	p.Gly79Cys	Unknown	1	1
c.287G>C	p.Arg96Thr	Unknown	1	1
c.302_307delTGGAGA	p.Glu102_Ile103del	Gain of function	1	1
c.305A>G	p.Glu102Gly	Gain of function	1	1
c.323G>T	p.Arg108Leu	Unknown	1	1
c.338G>A	p.Arg113Lys	Unknown	1	1
c.362G>C	p.Cys121Ser	Gain of function	1		1
c.370C>T	p.Pro124Ser	Gain of function	1			1
c.371C>T	p.Pro124Leu	Gain of function	1			1
c.391G>T	p.Gly131Cys	Unknown	1	1
c.394G>T	p.Ala132Ser	Unknown	1	1
c.443G>T	p.Gly148Val	Unknown	1	1
c.492A>C	p.Gln164His	Unknown	1		1
c.517-2A>T	Splicing site	Unknown	1			1
c.529C>G	p.Leu177Val	Benign	1	1
c.536A>T	p.Tyr179Phe	Unknown	1	1
c.555G>T	p.Lys185Asn	Unknown	1	1
c.568+1G>A	Splicing site	Unknown	1	1
c.584A>G	p.Asn195Ser	Unknown	1	1
c.607G>A	p.Glu203Lys	Gain of function	2	1	1
c.642G>T	p.Gln214His	Unknown	1	1
c.670G>A	p.Val224Met	Unknown	1	1
c.676A>G	p.Thr226Ala	Unknown	1	1
c.722C>G	p.Ser241Cys	Unknown	1	1
c.803C>T	p.Ala268Val	Unknown	1		1
c.961-2A>G	Splicing site	Unknown	1		1
c.982G>A	p.Gly328Arg	Unknown	1		1
c.1046G>A	p.Arg349Lys	Unknown	1		1
c.1132A>T	p.Thr378Ser	Unknown	1	1
MET
c.55G>T	p.Val19Leu	Unknown	1		1
c.59A>G	p.Gln20Arg	Unknown	1	1
c.71G>A	p.Gly24Glu	Benign	1	1
c.82G>A	p.Glu28Lys	Unknown	1		1
c.100G>A	p.Glu34Lys	Unknown	1		1
c.110T>C	p.Val37Ala	Benign	2	1	1
c.117G>A	p.Met39Ile	Unknown	1			1
c.124C>T	p.Gln42Ter	Loss of function	1			1
c.130C>T	p.Pro44Ser	Unknown	1	1
c.135C>A	p.Asn45Lys	Unknown	1	1
c.142G>A	p.Ala48Thr	Unknown	1	1
c.143C>T	p.Ala48Val	Benign	1	1
c.175G>C	p.Glu59Gln	Unknown	1	1
c.219A>T	p.Leu73Phe	Unknown	1	1
c.223G>A	p.Glu75Lys	Unknown	2	2
c.244G>C	p.Ala82Pro	Unknown	1	1
c.308G>A	p.Ser103Asn	Unknown	1		1
c.370A>G	p.Thr124Ala	Unknown	1		1
c.406G>A	p.Val136Ile	Unknown	1	1
c.467C>T	p.Ser156Leu	Benign	4	3	1
c.504G>T	p.Glu168Asp	Benign	37	27	7	2	1
c.520G>A	p.Asp174Asn	Unknown	1		1
c.572G>A	p.Arg191Gln	Unknown	2	2
c.607T>A	p.Ser203Thr	Benign	2		2
c.636T>A	p.His212Gln	Unknown	1	1
c.727G>T	p.Asp243Tyr	Unknown	1		1
c.770A>C	p.Asn257Thr	Unknown	1		1
c.794A>T	p.Gln265Leu	Unknown	1	1
c.948A>G	p.Ile316Met	Benign	7	4	3
c.959C>T	p.Ala320Val	Benign	2	1	1
c.964_965dupGT	p.Lys324AlafsTer11	Loss of function	2	2
c.1009C>A	p.Leu337Met	Unknown	1		1
c.1019A>G	p.Asp340Gly	Unknown	1		1
c.1031G>A	p.Gly344Glu	Unknown	2			2
c.1039G>A	p.Ala347Thr	Benign	1	1
c.1053T>A	p.Asp351Glu	Unknown	1		1
c.1076G>A	p.Arg359Gln	Unknown	2	2
c.1085T>C	p.Met362Thr	Benign	1	1
c.1159C>T	p.Gln387Ter	Loss of function	1		1
c.1199G>T	p.Arg400Met	Unknown	1		1
c.1217C>T	p.Ser406Leu	Unknown	1		1
c.1237C>T	p.Arg413Cys	Unknown	1			1
c.1238G>A	p.Arg413His	Unknown	2	2
c.1249C>T	p.Arg417Ter	Loss of function	2	1	1
c.1275G>T	p.Gln425His	Unknown	1		1
c.1277G>A	p.Arg426His	Unknown	1	1
c.1279G>A	p.Val427Ile	Unknown	2	1	1
c.1287A>T	p.Leu429Phe	Unknown	1	1
c.1306G>A	p.Glu436Lys	Unknown	1			1
c.1343G>A	p.Gly448Glu	Unknown	1			1
c.1392+1G>A	Splicing site	Unknown	1	1
c.1393G>A	p.Val465Ile	Unknown	1			1
c.1421C>A	p.Thr474Asn	Unknown	1	1
c.1424C>G	p.Pro475Arg	Unknown	1	1
c.1451A>G	p.His484Arg	Unknown	1	1
c.1477G>C	p.Glu493Gln	Unknown	2	2
c.1486T>A	p.Leu496Ile	Unknown	1	1
c.1528-1G>A	Splicing site	Unknown	1		1
c.1579A>G	p.Ser527Gly	Unknown	1		1
c.1613delG	p.Cys538LeufsTer15	Loss of function	2	2
c.1640G>A	p.Arg547Gln	Unknown	1		1
c.1661G>T	p.Gly554Val	Unknown	1	1
c.1663delA	p.Thr555HisfsTer27	Loss of function	1	1
c.1740G>T	p.Arg580Ser	Unknown	1		1
c.1771C>T	p.Arg591Trp	Unknown	1		1
c.1772G>A	p.Arg591Gln	Unknown	1	1
c.1779T>A	p.Asn593Lys	Unknown	1			1
c.1782T>A	p.Asn594Lys	Unknown	1			1
c.1805G>T	p.Arg602Ile	Unknown	1	1
c.1872C>G	p.Cys624Trp	Unknown	1		1
c.1883C>T	p.Pro628Leu	Unknown	1	1
c.1889T>A	p.Met630Lys	Unknown	1	1
c.1930C>T	p.His644Tyr	Unknown	1	1
c.1934G>T	p.Gly645Val	Unknown	1	1
c.1957T>A	p.Ser653Thr	Unknown	1		1
c.1958C>T	p.Ser653Phe	Unknown	1			1
c.1970C>T	p.Pro657Leu	Unknown	1			1
c.2012G>T	p.Gly671Val	Unknown	1	1
c.2015G>A	p.Gly672Asp	Unknown	1	1
c.2022A>T	p.Leu674Phe	Unknown	1		1
c.2036G>T	p.Gly679Val	Unknown	1	1
c.2072C>A	p.Ser691Ter	Loss of function	1		1
c.2140C>A	p.Gln714Lys	Unknown	1		1
c.2201G>A	p.Ser734Asn	Unknown	1	1
c.2236G>A	p.Glu746Lys	Unknown	1		1
c.2270G>A	p.Trp757Ter	Loss of function	1		1
c.2323G>A	p.Gly775Arg	Unknown	1	1
c.2327G>A	p.Ser776Asn	Unknown	1			1
c.2554A>G	p.Ile852Val	Unknown	1	1
c.2529delG	p.Ile844SerfsTer23	Loss of function	1		1
c.2638-1G>A	Splicing site	Loss of function	1		1
c.2647A>T	p.Ile883Phe	Unknown	1	1
c.2653C>A	p.Pro885Thr	Unknown	1	1
c.2658A>T	p.Glu886Asp	Unknown	1	1
c.2662G>A	p.Val888Ile	Unknown	1	1
c.2683G>A	p.Val895Ile	Unknown	1	1
c.2671G>A	p.Glu891Lys	Unknown	1	1
c.2708T>A	p.Ile903Lys	Unknown	1	1
c.2708T>A	p.His904Arg	Unknown	1	1
c.2708T>A	p.Val910Ile	Unknown	1	1
c.2731T>G	p.Leu911Val	Unknown	1	1
c.2736C>A	p.Cys912Ter	Loss of function	1		1
c.2768G>A	p.Ser923Asn	Unknown	1		1
c.2770G>A	p.Glu924Lys	Unknown	1			1
c.2801C>T	p.Ser934Phe	Unknown	1		1
c.2809G>T	p.Val937Phe	Unknown	1	1
c.2864G>A	p.Gly955Asp	Unknown	1	1
c.2906T>G	p.Phe969Cys	Unknown	1		1
c.2927G>A	p.Arg976Lys	Unknown	1	1
c.2929A>T	p.Lys977Ter	Loss of function	1			1
c.2927G>T	p.Arg976Ile	Unknown	2		2
c.2938A>G	p.Lys980Glu	Unknown	1			1
c.2942-38_2945del	Splicing site	Gain of function	1	1
c.2942-36_2945-5del	Splicing site	Gain of function	1	1
c.2942-19_2946delTCTTTCTCTCTGTTTTAAGATCTG	Splicing site	Gain of function	1	1
c.2942-18_2942-6delCTTTCTCTCTGTT	Splicing site	Gain of function	1	1
c.2942-18_2942-9delCTTTCTCTCT	Splicing site	Gain of function	2	2
c.2942-18_2952delCTTTCTCTCTGTTTTAAGATCTGGGCAGT	Splicing site	Gain of function	1	1
c.2942-15_2942-1delTCTCTCTGTTTTAAG	Splicing site	Gain of function	2	2
c.2942-11_2942-2delTCTGTTTTAA	Splicing site	Gain of function	1	1
c.2942-7_2942-2delTTTTAA	Splicing site	Gain of function	1	1
c.2942-6_2942-1delTTTAAG	Splicing site	Gain of function	1	1
c.2942-6_2958delTTTAAGATCTGGGCAGTGAATTA	Splicing site	Gain of function	2	2
c.2942-2A>C	Splicing site	Gain of function	1	1
c.2942-1G>A	Splicing site	Gain of function	1	1
c.2943T>A	p.Asp981Glu	Unknown	1	1
c.2948G>A	p.Gly983Asp	Unknown	1		1
c.2994G>T	p.Leu998Phe	Unknown	1			1
c.2995G>T	p.Asp999Tyr	Unknown	1			1
c.3005dupT	p.Ser1003GlufsTer13	Loss of function	1		1
c.3011C>G	p.Ala1004Gly	Unknown	1	1
c.3014G>A	p.Arg1005Gln	Unknown	1	1
c.3061_3063delTAC	p.Tyr1021del	Unknown	1	1
c.3079_3082+3delGAAGGTA	Splicing site	Gain of function	1	1
c.3080_3082+12delAAGGTATATTTCAGT	Splicing site	Gain of function	1		1
c.3082G>A	Splicing site	Gain of function	4	4
c.3082G>C	Splicing site	Gain of function	3	3
c.3082G>T	Splicing site	Gain of function	1	1
c.3082+1G>A	Splicing site	Gain of function	3	3
c.3082+2T>C	Splicing site	Gain of function	5	5
c.3082+3A>G	Splicing site	Gain of function	1	1
c.3082+3A>T	Splicing site	Gain of function	1	1
c.3082+8T>G	Splicing site	Gain of function	1	1
c.3101C>G	p.Ser1034Cys	Unknown	1	1
c.3119G>A	p.Arg1040Gln	Benign	1	1
c.3192delA	p.Leu1064PhefsTer13	Loss of function	1		1
c.3272C>T	p.Pro1091Leu	Benign	1	1
c.3290A>G	p.His1097Arg	Unknown	2	1		1
c.3298G>T	p.Glu1100Ter	Loss of function	1		1
c.3328G>A	p.Val1110Ile	Gain of function	1	1
c.3334C>T	p.His1112Tyr	Gain of function	1			1
c.3337G>A	p.Gly1113Arg / Splicing site	Loss of function	1		1
c.3410G>C	p.Gly1137Ala	Benign	1	1
c.3445A>C	p.Met1149Leu	Unknown	1	1
c.3446T>C	p.Met1149Thr	Gain of function	1	1
c.3472C>A	p.Leu1158Ile	Unknown	1	1
c.3496C>T	p.Arg1166Ter	Loss of function	2		2
c.3497G>A	p.Arg1166Gln	Unknown	1		1
c.3511C>T	p.Pro1171Ser	Unknown	1			1
c.3562C>T	p.Arg1188Ter	Loss of function	1		1
c.3563G>T	p.Arg1188Leu	Unknown	1		1
c.3571A>C	p.Thr1191Pro	Unknown	1	1
c.3571A>G	p.Thr1191Ala	Unknown	1		1
c.3576T>C	p.His1192His	Benign	1		1
c.3592G>T	p.Asp1198Tyr	Unknown	1		1
c.3595C>T	p.Leu1199Phe	Unknown	1		1
c.3619G>A	p.Ala1207Thr	Unknown	2	2
c.3669G>T	p.Leu1223Phe	Unknown	1			1
c.3674C>A	p.Ala1225Glu	Unknown	1			1
c.3677G>A	p.Arg1226Lys	Unknown	1			1
c.3677G>T	p.Arg1226Ile	Unknown	1		1
c.3694G>A	p.Glu1232Lys	Unknown	1		1
c.3741G>A	p.Met1247Ile	Unknown	1	1
c.3747T>A	p.Asp1249Glu	Unknown	1			1
c.3766_3768delCAC	p.His1256del	Unknown	1		1
c.3863G>A	p.Gly1288Asp	Unknown	1	1
c.3830dupA	p.Phe1278ValfsTer27	Loss of function	1		1
c.3840_3841delCA	p.Lys1281ValfsTer23	Loss of function	1			1
c.3871C>T	p.Leu1291Phe	Unknown	1			1
c.4025C>T	p.Ala1342Val	Unknown	1			1
c.4033C>T	p.Arg1345Cys	Unknown	2		2
c.4034G>A	p.Arg1345His	Unknown	1	1
c.4065A>G	p.Ile1355Met	Unknown	1	1
c.4067C>T	p.Ser1356Leu	Unknown	1		1
c.4070C>T	p.Ala1357Val	Unknown	1	1
c.4073T>A	p.Ile1358Asn	Unknown	1	1
c.4106A>T	p.His1369Leu	Unknown	1			1
c.4115_4129delCTACTTATGTGAACG	p.Ala1372_Asn1376del	Unknown	1	1
NRAS
c.34G>A	p.Gly12Ser	Gain of function	1		1
c.34G>T	p.Gly12Cys	Gain of function	3	1	1	1
c.35G>A	p.Gly12Asp	Gain of function	14	3	9	2
c.35G>C	p.Gly12Ala	Gain of function	2	1	1
c.35G>T	p.Gly12Val	Gain of function	2	1	1
c.37G>C	p.Gly13Arg	Gain of function	3		2	1
c.38G>T	p.Gly13Val	Gain of function	1		1
c.44G>A	p.Gly15Glu	Unknown	1	1
c.75G>T	p.Gln25His	Unknown	1			1
c.100C>T	p.Pro34Ser	Unknown	1	1
c.127C>T	p.Gln43Ter	Loss of function	1			1
c.136A>T	p.Ile46Leu	Unknown	1			1
c.181C>A	p.Gln61Lys	Gain of function	22	3	8	11
c.182A>G	p.Gln61Arg	Gain of function	22	5	2	15
c.182A>T	p.Gln61Leu	Gain of function	17	3	4	10
c.183A>C	p.Gln61His	Gain of function	2	2
c.183A>T	p.Gln61His	Gain of function	1			1
c.272C>T	p.Ala91Val	Gain of function	1			1
c.285_286delCT	p.Tyr96GlnfsTer5	Loss of function	1		1
c.305G>T	p.Arg102Leu	Unknown	1		1
c.331A>G	p.Met111Val	Unknown	3	3
c.380delC	p.Thr127LysfsTer34	Loss of function	1		1
c.400G>A	p.Ala134Thr	Unknown	2	2
c.425T>C	p.Ile142Thr	Unknown	1	1
c.446G>C	p.Arg149Thr	Unknown	2	2
c.470A>T	p.Tyr157Phe	Unknown	1		1
c.537G>T	p.Gln179His	Unknown	1	1
c.544A>T	p.Met182Leu	Unknown	1			1
c.553C>T	p.Pro185Ser	Benign	1	1
PDGFRA
c.5G>A	p.Gly2Glu	Unknown	1			1
c.58C>A	p.Leu20Ile	Unknown	1	1
c.97A>T	p.Asn33Tyr	Unknown	1		1
c.139C>G	p.Leu47Val	Unknown	1	1
c.142A>G	p.Arg48Gly	Unknown	1		1
c.174G>T	p.Gln58His	Unknown	1	1
c.175_177delTAC	p.Tyr59del	Unknown	1	1
c.208delG	p.Glu70LysfsTer13	Loss of function	1	1
c.236G>A	p.Gly79Asp	Benign	70	36	31	3
c.291G>T	p.Leu97Phe	Unknown	1	1
c.395G>A	p.Gly132Glu	Unknown	1			1
c.411A>T	p.Leu137Phe	Unknown	1	1
c.428A>G	p.Asp143Gly	Unknown	1		1
c.460G>T	p.Asp154Tyr	Unknown	1	1
c.487A>T	p.Asn163Tyr	Unknown	1		1
c.490A>T	p.Ser164Cys	Unknown	1	1
c.492T>A	p.Ser164Arg	Unknown	1	1
c.496G>T	p.Gly166Trp	Unknown	1	1
c.505C>T	p.Pro169Ser	Unknown	1		1
c.517G>A	p.Asp173Asn	Unknown	1		1
c.530G>T	p.Gly177Val	Unknown	1		1
c.599C>G	p.Thr200Ser	Benign	1		1
c.603C>G	p.Ile201Met	Unknown	1	1
c.628G>T	p.Ala210Ser	Unknown	1	1
c.629-4_629-2delATA	Splicing site	Unknown	1		1
c.661C>T	p.Leu221Phe	Benign	23	15	8
c.680C>T	p.Ser227Leu	Unknown	1		1
c.704G>T	p.Cys235Phe	Unknown	1	1
c.707C>A	p.Ala236Asp	Unknown	1	1
c.749C>A	p.Pro250His	Unknown	1	1
c.787G>T	p.Glu263Ter	Loss of function	1		1
c.788A>G	p.Glu263Gly	Unknown	1		1
c.800C>T	p.Pro267Leu	Unknown	1	1
c.833C>A	p.Pro278His	Unknown	1	1
c.833C>T	p.Pro278Leu	Unknown	1	1
c.836A>T	p.Glu279Val	Unknown	1	1
c.877C>T	p.Arg293Cys	Unknown	1		1
c.878G>A	p.Arg293His	Unknown	1		1
c.909G>T	p.Lys303Asn	Unknown	1		1
c.1014G>T	p.Glu338Asp	Unknown	1	1
c.1019G>A	p.Arg340Gln	Benign	3	1	1		1
c.1099G>A	p.Val367Met	Unknown	1		1
c.1107G>T	p.Lys369Asn	Unknown	1		1
c.1114G>A	p.Glu372Lys	Benign	1			1
c.1126C>T	p.Arg376Ter	Loss of function	1		1
c.1127G>A	p.Arg376Gln	Benign	1		1
c.1135T>G	p.Leu379Val	Benign	1		1
c.1138A>G	p.Lys380Glu	Unknown	1	1
c.1148G>C	p.Arg383Pro	Unknown	1	1
c.1159G>A	p.Glu387Lys	Unknown	1			1
c.1164C>A	p.Asp388Glu	Unknown	1	1
c.1211G>T	p.Ser404Ile	Unknown	1	1
c.1240C>T	p.Pro414Ser	Unknown	1			1
c.1285G>A	p.Gly429Arg	Benign	4	2	1	1
c.1295C>T	p.Thr432Met	Unknown	1	1
c.1319C>T	p.Thr440Met	Benign	1		1
c.1325T>C	p.Leu442Pro	Unknown	2	2
c.1330G>C	p.Asp444His	Unknown	1	1
c.1362G>T	p.Lys454Asn	Unknown	1		1
c.1365-1G>A	Splicing site	Loss of function	1		1
c.1375G>A	p.Glu459Lys	Unknown	1			1
c.1388C>G	p.Thr463Ser	Unknown	1	1
c.1395G>T	p.Leu465Phe	Unknown	4	2	2
c.1396G>T	p.Ala466Ser	Unknown	1		1
c.1400A>T	p.Asn467Ile	Unknown	1	1
c.1411A>C	p.Asn471His	Unknown	1	1
c.1436G>A	p.Arg479Gln	Unknown	1		1
c.1438G>A	p.Asp480Asn	Unknown	1		1
c.1471G>A	p.Ala491Thr	Benign	1		1
c.1487C>A	p.Thr496Asn	Unknown	1	1
c.1498C>T	p.Arg500Ter	Loss of function	1		1
c.1507G>A	p.Ala503Thr	Unknown	1		1
c.1511A>G	p.Lys504Arg	Unknown	1		1
c.1522G>A	p.Gly508Arg	Unknown	1			1
c.1565G>A	p.Arg522His	Unknown	1		1
c.1568C>G	p.Ser523Cys	Unknown	1	1
c.1607T>A	p.Val536Glu	Gain of function	1				1
c.1628T>C	p.Ile543Thr	Unknown	1	1
c.1658C>T	p.Pro553Leu	Unknown	2		2
c.1672C>T	p.Arg558Cys	Benign	1			1
c.1682T>A	p.Val561Asp	Gain of function	1		1
c.1693A>G	p.Ile565Val	Unknown	1	1
c.1697_1711delGCCCAGATGGACATG	p.Ser566_Glu571delinsLys	Gain of function	1				1
c.1705G>A	p.Gly569Arg	Unknown	1			1
c.1730C>G	p.Pro577Arg	Unknown	1			1
c.1730C>T	p.Pro577Leu	Unknown	1		1
c.1859C>A	p.Pro620His	Unknown	1	1
c.1972_1973insC	p.Val658AlafsTer31	Loss of function	1		1
c.1973T>A	p.Val658Glu	Unknown	1		1
c.2025G>T	p.Glu675Asp	Unknown	1		1
c.2137G>A	p.Ala713Thr	Unknown	1	1
c.2153G>A	p.Arg718Gln	Unknown	1		1
c.2169A>T	p.Leu723Phe	Unknown	1			1
c.2194A>G	p.Met732Val	Unknown	1	1
c.2209G>A	p.Ala737Thr	Unknown	1		1
c.2274G>C	p.Gln758His	Unknown	1	1
c.2290C>T	p.Arg764Cys	Unknown	1	1
c.2291G>A	p.Arg764His	Benign	1	1
c.2293C>T	p.Pro765Ser	Unknown	1	1
c.2317A>G	p.Met773Val	Unknown	1		1
c.2365G>C	p.Gly789Arg	Unknown	1	1
c.2380G>T	p.Asp794Tyr	Unknown	1	1
c.2396C>T	p.Thr799Ile	Unknown	1		1
c.2419G>A	p.Glu807Lys	Unknown	1		1
c.2428G>A	p.Ala810Thr	Unknown	1		1
c.2438delA	p.Asn813IlefsTer20	Loss of function	1		1
c.2461delG	p.Ala821LeufsTer12	Loss of function	1		1
c.2465G>T	p.Arg822Leu	Unknown	1		1
c.2476C>A	p.Leu826Met	Unknown	1	1
c.2494G>T	p.Val832Leu	Unknown	1	1
c.2525A>T	p.Asp842Val	Gain of function	1				1
c.2525_2527delACA	p.Asp842_Ile843delinsVal	Gain of function	1				1
c.2534A>G	p.His845Arg	Unknown	1		1
c.2540C>T	p.Ser847Leu	Unknown	1			1
c.2560A>T	p.Ser854Cys	Unknown	1	1
c.2572C>T	p.Pro858Ser	Unknown	1	1
c.2605G>C	p.Asp869His	Unknown	1		1
c.2606A>G	p.Asp869Gly	Unknown	1		1
c.2639C>G	p.Ser880Cys	Unknown	1	1
c.2669C>T	p.Ser890Phe	Unknown	1			1
c.2674+1G>A	Splicing site	Loss of function	1		1
c.2684_2685insA	p.Tyr896LeufsTer13	Loss of function	1		1
c.2688C>A	p.Tyr896Ter	Loss of function	1	1
c.2689C>A	p.Pro897Thr	Unknown	1	1
c.2724G>T	p.Lys908Asn	Unknown	1		1
c.2741G>A	p.Arg914Gln	Unknown	1	1
c.2822C>A	p.Pro941His	Unknown	2	2
c.2842G>T	p.Glu948Ter	Loss of function	1	1
c.2867G>T	p.Gly956Val	Unknown	1		1
c.2896C>T	p.His966Tyr	Unknown	1			1
c.2899C>G	p.Leu967Val	Unknown	1	1
c.2907C>A	p.Phe969Leu	Unknown	1	1
c.2947G>A	p.Asp983Asn	Unknown	2			2
c.2932G>A	p.Ala978Thr	Unknown	1		1
c.2969G>T	p.Gly990Val	Unknown	1	1
c.2979C>A	p.Tyr993Ter	Loss of function	1	1
c.2982A>C	p.Lys994Asn	Unknown	1		1
c.2987A>T	p.Glu996Val	Unknown	1	1
c.2989G>A	p.Glu997Lys	Unknown	1			1
c.3013G>C	p.Gly1005Arg	Unknown	1		1
c.3034C>G	p.Leu1012Val	Unknown	1	1
c.3040G>T	p.Ala1014Ser	Unknown	2	1	1
c.3058A>G	p.Ile1020Val	Unknown	1	1
c.3093G>T	p.Glu1031Asp	Unknown	1		1
c.3155C>T	p.Thr1052Met	Benign	3	3
c.3162delC	p.Ser1055AlafsTer18	Unknown	1	1
c.3188_3189delAG	p.Glu1063GlyfsTer5	Loss of function	1		1
c.3211G>A	p.Asp1071Asn	Unknown	1		1
c.3223G>A	p.Asp1075Asn	Unknown	1		1
c.3235G>A	p.Asp1079Asn	Unknown	1	1
c.3258C>G	p.Asp1086Glu	Unknown	1	1
c.3261C>G	p.Ser1087Arg	Unknown	1	1
GIST = Gastrointestinal Stromal Tumors
